# Supplementary material for: A terbium(iii) lanthanide–organic framework as a platform for a recyclable multi-responsive luminescent sensor
Source: Royal Society of Chemistry journal article supplement (doi:10.1039/c6tc05615f), 2017-01-01
Supplement: c6tc05615f1.pdf [file c6tc05615f1.pdf]

*Electronic Supplementary Information*

**A terbium(III) lanthanide–organic framework as a platform for recyclable multi-responsive luminescent sensor**

**Min Chen, Wen-Ming Xu, Jia-Yue Tian, Hui Cui, Jiao-Xing Zhang, Chun-Sen Liu\* and Miao Du\***

*Henan Provincial Key Laboratory of Surface & Interface Science, Zhengzhou University of Light Industry, Zhengzhou 450002, China*

\* E-mail: chunsenliu@zzuli.edu.cn, dumiao@zzuli.edu.cn

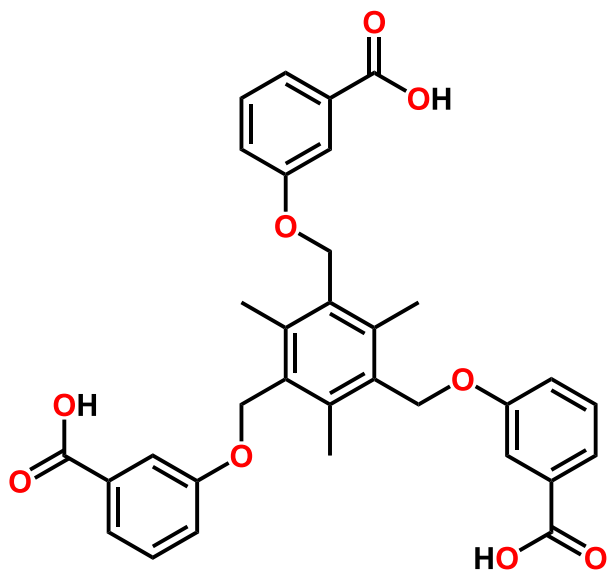

**Scheme S1.** Schematic drawing of the ligand H<sub>3</sub>TBOT.

**Table S1.** Crystallographic data and structure refinement details for 534-MOF-Tb.

| 534-MOF-Tb                                                                                                          |                                                    |
|---------------------------------------------------------------------------------------------------------------------|----------------------------------------------------|
| Empirical formula                                                                                                   | C <sub>33</sub> H <sub>29</sub> O <sub>10</sub> Tb |
| Formula weight                                                                                                      | 744.48                                             |
| Crystal system                                                                                                      | Monoclinic                                         |
| Space group                                                                                                         | C2/c                                               |
| <i>a</i> / Å                                                                                                        | 30.773(2)                                          |
| <i>b</i> / Å                                                                                                        | 9.3088(4)                                          |
| <i>c</i> / Å                                                                                                        | 30.411(2)                                          |
| $\beta$ / °                                                                                                         | 111.272(8)                                         |
| Volume / Å <sup>3</sup>                                                                                             | 8118.2(9)                                          |
| <i>Z</i>                                                                                                            | 8                                                  |
| <i>D</i> / g cm <sup>-3</sup>                                                                                       | 1.218                                              |
| $\mu$ / mm <sup>-1</sup>                                                                                            | 8.940                                              |
| <i>F</i> (000)                                                                                                      | 2976                                               |
| <i>R</i> <sub>int</sub>                                                                                             | 0.0447                                             |
| Goodness-of-fit on <i>F</i> <sup>2</sup>                                                                            | 0.841                                              |
| <i>R</i> <sub>1</sub> <sup><i>a</i></sup> / <i>wR</i> <sub>2</sub> <sup><i>b</i></sup> [ <i>I</i> > 2σ( <i>I</i> )] | 0.0935 / 0.2304                                    |
| <i>R</i> <sub>1</sub> <sup><i>a</i></sup> / <i>wR</i> <sub>2</sub> <sup><i>b</i></sup> (All data)                   | 0.1023 / 0.2403                                    |
| CCDC number                                                                                                         | 1509860                                            |

<sup>*a*</sup>  $R_1 = \sum ||F_o| - |F_c|| / \sum |F_o|$ . <sup>*b*</sup>  $wR_2 = \sqrt{\sum w(|F_o|^2 - |F_c|^2)|^2 / \sum w(F_o)^2}^{1/2}$ , where  $w = 1/[\sigma^2(F_o^2) + (aP)^2 + bP]$ .  $P = (F_o^2 + 2F_c^2)/3$ .

**Table S2.** A comparison of the selected bond lengths (Å) and angles (°) for 534-MOF-Tb.<sup>a</sup>

| 534-MOF-Tb                             |            |                                        |          |
|----------------------------------------|------------|----------------------------------------|----------|
| Tb1–O1                                 | 2.272(6)   | Tb1–O10                                | 2.452(8) |
| Tb1–O2 <sup>#1</sup>                   | 2.294(6)   | Tb1–O6 <sup>#2</sup>                   | 2.323(7) |
| Tb1–O5 <sup>#3</sup>                   | 2.354(6)   | Tb1–O4 <sup>#4</sup>                   | 2.376(6) |
| Tb1–O3 <sup>#5</sup>                   | 2.377(6)   | Tb1–O4 <sup>#5</sup>                   | 2.713(7) |
| O1–Tb1–O2 <sup>#1</sup>                | 80.8(2)    | O1–Tb1–O6 <sup>#2</sup>                | 93.8(3)  |
| O2 <sup>#1</sup> –Tb1–O6 <sup>#2</sup> | 145.6(2)   | O1–Tb1–O5 <sup>#3</sup>                | 111.9(3) |
| O2 <sup>#1</sup> –Tb1–O5 <sup>#3</sup> | 77.2(2)    | O6 <sup>#2</sup> –Tb1–O5 <sup>#3</sup> | 134.9(2) |
| O1–Tb1–O4 <sup>#4</sup>                | 83.1(3)    | O2 <sup>#1</sup> –Tb1–O4 <sup>#4</sup> | 139.7(2) |
| O6 <sup>#2</sup> –Tb1–O4 <sup>#4</sup> | 72.0(2)    | O5 <sup>#3</sup> –Tb1–O4 <sup>#4</sup> | 75.0(2)  |
| O1–Tb1–O3 <sup>#5</sup>                | 149.4(3)   | O2 <sup>#1</sup> –Tb1–O3 <sup>#5</sup> | 80.6(2)  |
| O6 <sup>#2</sup> –Tb1–O3 <sup>#5</sup> | 88.0(3)    | O5 <sup>#3</sup> –Tb1–O3 <sup>#5</sup> | 87.3(3)  |
| O4 <sup>#4</sup> –Tb1–O3 <sup>#5</sup> | 126.1(2)   | O1–Tb1–O10                             | 75.8(4)  |
| O2 <sup>#1</sup> –Tb1–O10              | 73.3(3)    | O6 <sup>#2</sup> –Tb1–O10              | 72.5(3)  |
| O5 <sup>#3</sup> –Tb1–O10              | 147.8(3)   | O4 <sup>#4</sup> –Tb1–O10              | 136.9(3) |
| O3 <sup>#5</sup> –Tb1–O10              | 75.7(3)    | O1–Tb1–O4 <sup>#5</sup>                | 157.3(2) |
| O2 <sup>#1</sup> –Tb1–O4 <sup>#5</sup> | 121.05(19) | O6 <sup>#2</sup> –Tb1–O4 <sup>#5</sup> | 71.7(2)  |
| O5 <sup>#3</sup> –Tb1–O4 <sup>#5</sup> | 71.1(2)    | O4 <sup>#4</sup> –Tb1–O4 <sup>#5</sup> | 75.9(2)  |
| O3 <sup>#5</sup> –Tb1–O4 <sup>#5</sup> | 50.2(2)    | O10–Tb1–O4 <sup>#5</sup>               | 114.4(3) |

<sup>a</sup> Symmetry code: For 534-MOF-Tb and : #1 =  $-x + 1/2, -y + 1/2, -z + 1$ ; #2 =  $-x + 1, -y + 1, -z + 1$ ; #3 =  $x - 1/2, y - 3/2, z$ ; #4 =  $-x + 1, y - 1, -z + 3/2$ ; #5 =  $x - 1/2, -y + 1/2, z - 1/2$ .

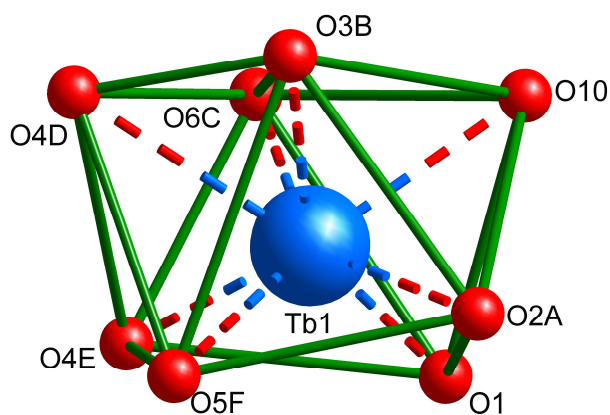

**Fig. S1** Coordination sphere of the  $\text{Tb}^{3+}$  ion in 534-MOF-Tb. Symmetry codes =  $-x + 1/2, -y + 1/2, -z + 1$  for A;  $x - 1/2, -y + 1/2, z - 1/2$  for B;  $-x + 1, -y + 1, -z + 1$  for C;  $x - 1/2, -y + 1/2, z - 1/2$  for D;  $-x + 1, y - 1, -z + 3/2$  for E;  $x - 1/2, y - 3/2, z$  for F.

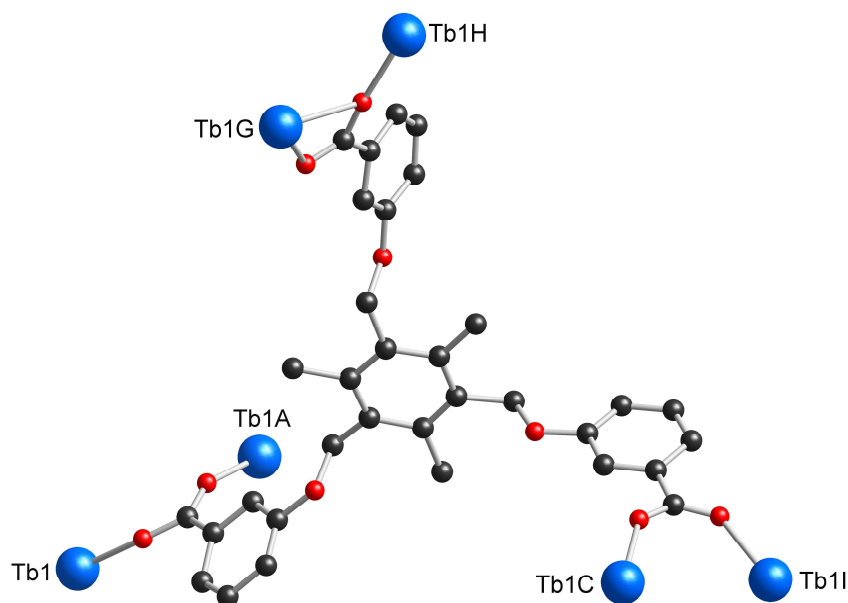

**Fig. S2** Coordination mode of the TBOT ligand in 534-MOF-Tb. Symmetry codes =  $-x + 1/2, -y + 1/2, -z + 1$  for A;  $-x + 1, -y + 1, -z + 1$  for C;  $x + 1/2, -y + 1/2, z + 1/2$  for G;  $-x + 1, y + 1, -z + 3/2$  for H;  $x + 1/2, y + 3/2, z$  for I.

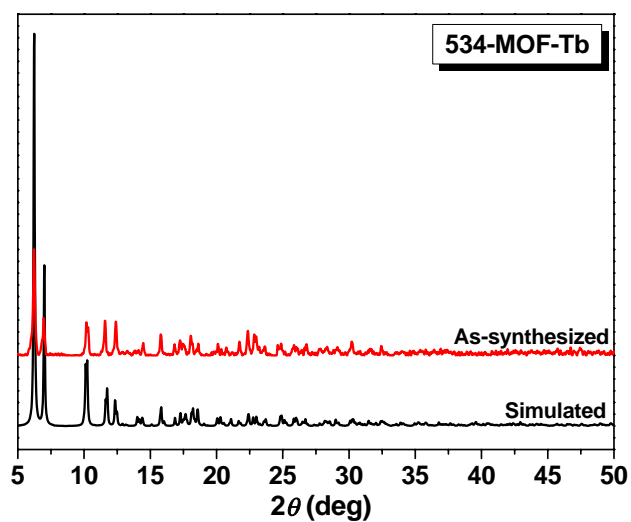

(a)

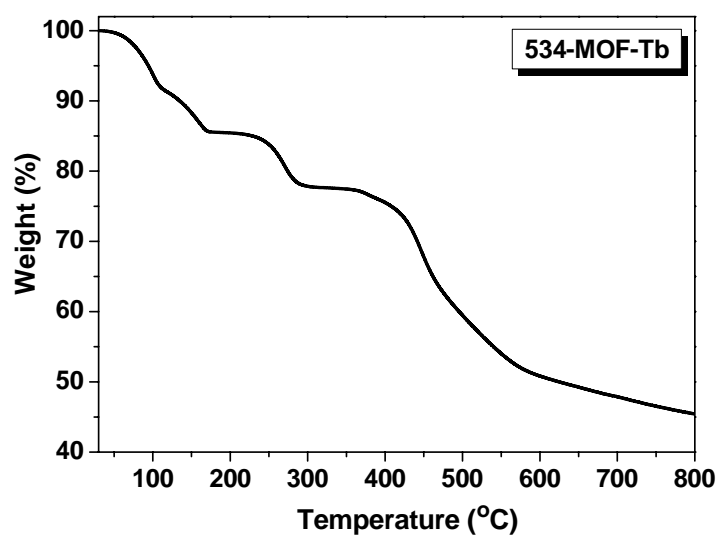

(b)

**Fig. S3** Power X-ray diffraction patterns (a) and TGA curve (b) of 534-MOF-Tb.

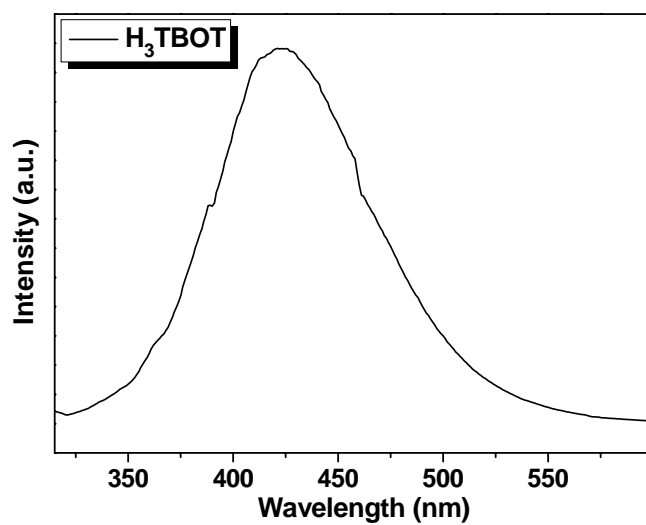

(a)

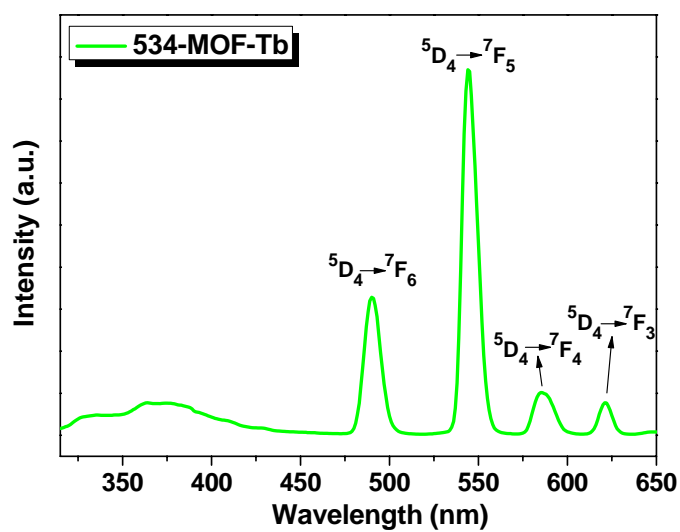

(b)

**Fig. S4** Solid state emission spectra of H<sub>3</sub>TBOT (a) and 534-MOF-Tb (b).

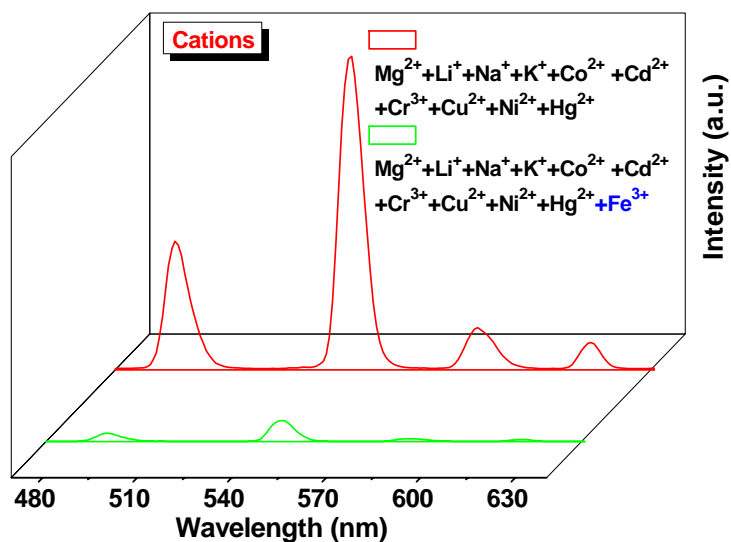

**Fig. S5** Emission spectra of 534-MOF-Tb dispersed in aqueous solutions of mixed cations without or with  $\text{Fe}^{3+}$ .

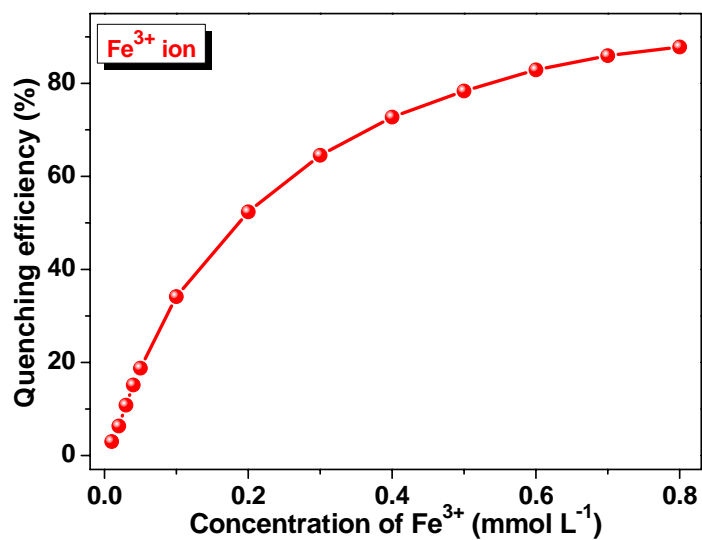

**Fig. S6** Dependence of the quenching efficiency on the concentration of  $\text{Fe}^{3+}$ .



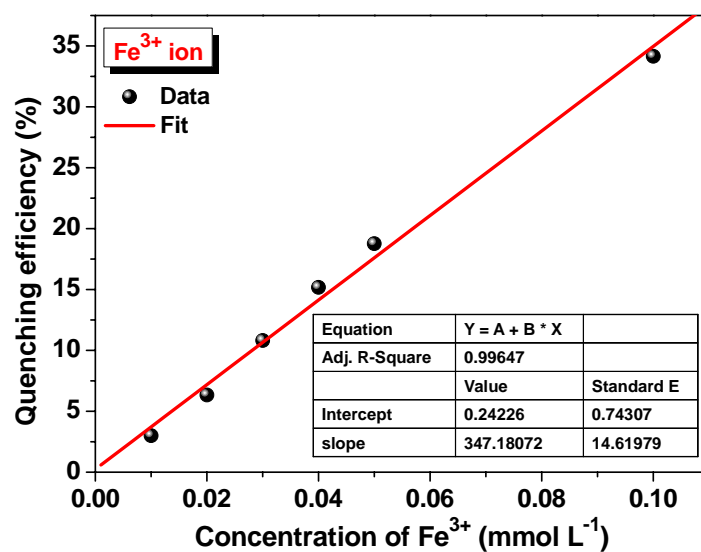

**Fig. S7** The fitting plot of the quenching efficiency with the increasing concentration of Fe<sup>3+</sup> in the low concentration range. The red line corresponds to a fit to the linear relationship.

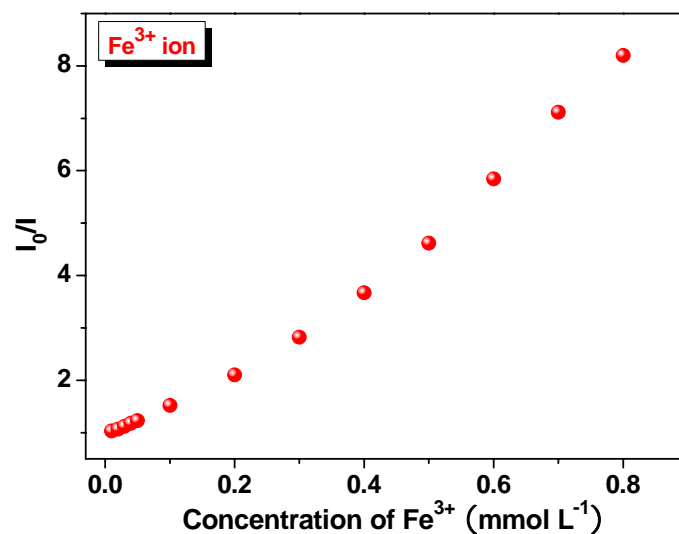

(a)

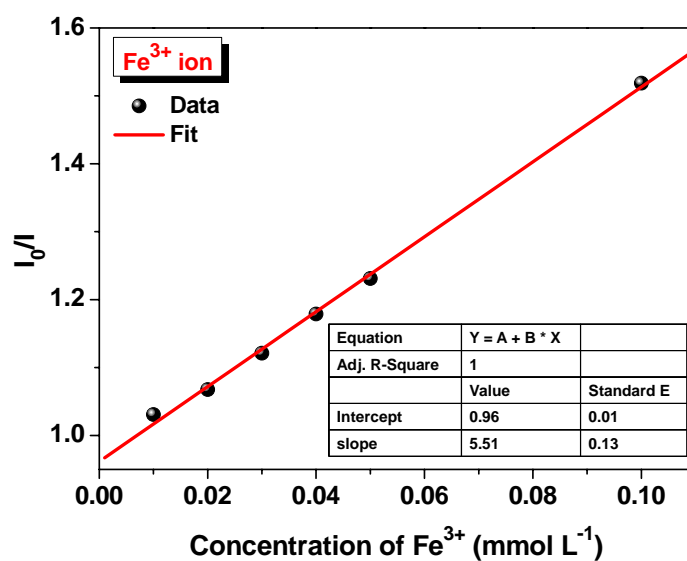

(b)

**Fig. S8** (a) Stern–Volmer plot of  $I_0/I$  versus the concentration of Fe<sup>3+</sup>. (b) The linear Stern–Volmer plot in the low concentration range. The red line corresponds to a fit to the linear relationship.

**Table S3.** A comparison between MOF-based luminescent probes for the detection of Fe<sup>3+</sup>, Cr<sub>2</sub>O<sub>7</sub><sup>2-</sup> and MnO<sub>4</sub><sup>-</sup>.

| Analyte                                      | MOF                                                                                                                                          | Solution | Detection Limit            | K <sub>sv</sub>        | Ref. |
|----------------------------------------------|----------------------------------------------------------------------------------------------------------------------------------------------|----------|----------------------------|------------------------|------|
| Fe <sup>3+</sup>                             | [Tb(L <sub>1</sub> ) <sub>1.5</sub> (H <sub>2</sub> O)](H <sub>2</sub> O) <sub>3</sub>                                                       | water    | —                          | —                      | S1   |
| Fe <sup>3+</sup>                             | [Eu(HL <sub>2</sub> )(DMF)(H <sub>2</sub> O) <sub>2</sub> ](H <sub>2</sub> O) <sub>3</sub>                                                   | water    | —                          | 1.52 × 10 <sup>3</sup> | S2   |
| Fe <sup>3+</sup>                             | [Tb(HL <sub>2</sub> )(DMF)(H <sub>2</sub> O) <sub>2</sub> ](H <sub>2</sub> O) <sub>3</sub>                                                   | water    | —                          | 4.48 × 10 <sup>3</sup> | S2   |
| Fe <sup>3+</sup>                             | [Zn <sub>3</sub> (HL <sub>2</sub> ) <sub>2</sub> (H <sub>2</sub> O) <sub>2</sub> ](DMF) <sub>2</sub> (H <sub>2</sub> O) <sub>7</sub>         | water    | —                          | 381.85                 | S2   |
| Fe <sup>3+</sup>                             | [H <sub>2</sub> NMe <sub>2</sub> ][Eu(HL <sub>3</sub> )]                                                                                     | water    | —                          | —                      | S3   |
| Fe <sup>3+</sup>                             | ([Eu <sub>2</sub> (L <sub>4</sub> ) <sub>3</sub> (DMA)(H <sub>2</sub> O) <sub>3</sub> ](DMA)(H <sub>2</sub> O) <sub>4.5</sub>                | water    | —                          | 1.07 × 10 <sup>4</sup> | S4   |
| Fe <sup>3+</sup>                             | [Eu(HL <sub>5</sub> ) <sub>2</sub> (NO <sub>3</sub> )](H <sub>2</sub> O)                                                                     | ethanol  | 0.026 mmol L <sup>-1</sup> | —                      | S5   |
| Cr <sub>2</sub> O <sub>7</sub> <sup>2-</sup> | [Eu(HL <sub>5</sub> ) <sub>2</sub> (NO <sub>3</sub> )](H <sub>2</sub> O)                                                                     | ethanol  | 0.022 mmol L <sup>-1</sup> | —                      | S5   |
| Cr <sub>2</sub> O <sub>7</sub> <sup>2-</sup> | [Zn(L <sub>6</sub> )(L <sub>7</sub> )]                                                                                                       | water    | —                          | 6.56 × 10 <sup>6</sup> | S6   |
| MnO <sub>4</sub> <sup>-</sup>                | [Ba <sub>3</sub> La <sub>0.5</sub> (μ <sub>3</sub> -L <sub>8</sub> ) <sub>2.5</sub> (H <sub>2</sub> O) <sub>3</sub> (DMF)](DMF) <sub>3</sub> | water    | 0.28 μM                    | 7.73 × 10 <sup>3</sup> | S7   |

H<sub>2</sub>L<sub>1</sub> = 2-(2-hydroxy-propionylamino)-terephthalic acid;

H<sub>4</sub>L<sub>2</sub> = 2,8,14,20-tetra-ethyl-6,12,18,24-tetra-methoxy-4,10,16,22-tetra-carboxy-methoxy-calix[4]arene);

H<sub>4</sub>L<sub>3</sub> = tetrakis[4-(carboxyphenyl)oxamethyl]methane acid;

H<sub>2</sub>L<sub>4</sub> = 9,9-dimethyl-2,7-fluorenedicarboxylic acid;

H<sub>2</sub>L<sub>5</sub> = 3-(1*H*-pyrazol-3-yl) benzoic acid;

HL<sub>6</sub> = 2-amino-1,4-benzenedicarboxylic acid;

L<sub>7</sub> = 4,4'-bis(imidazol-1-ylmethyl)-biphenyl;

H<sub>3</sub>L<sub>8</sub> = *p*-terphenyl-3,4'',5-tricarboxylic acid;

DMF = dimethylformamide;

DMA = dimethylacetamide.

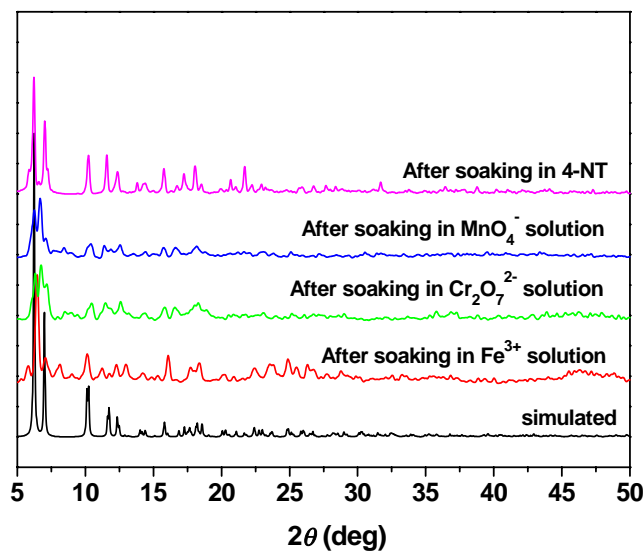

**Fig. S9** Power X-ray diffraction patterns of 534-MOF-Tb after five recyclable experiments.

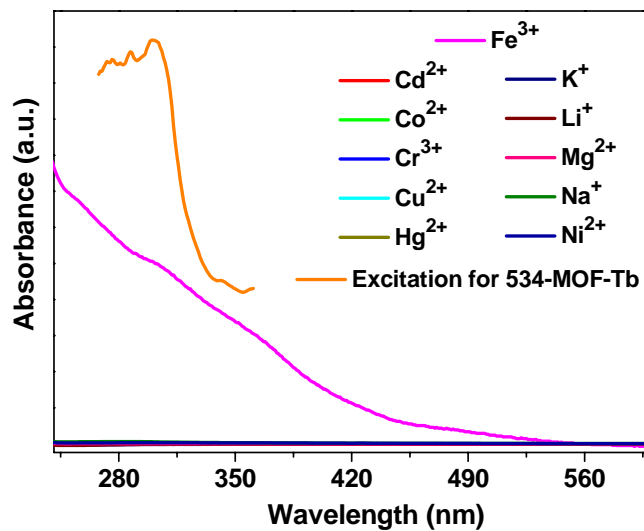

**Fig. S10** The UV-Vis absorption spectrum of aqueous solutions of different testing cations (Li<sup>+</sup>, Na<sup>+</sup>, K<sup>+</sup>, Mg<sup>2+</sup>, Cu<sup>2+</sup>, Co<sup>2+</sup>, Cd<sup>2+</sup>, Ni<sup>2+</sup>, Hg<sup>2+</sup>, Cr<sup>3+</sup>, and Fe<sup>3+</sup>) and the excitation for 534-MOF-Tb.

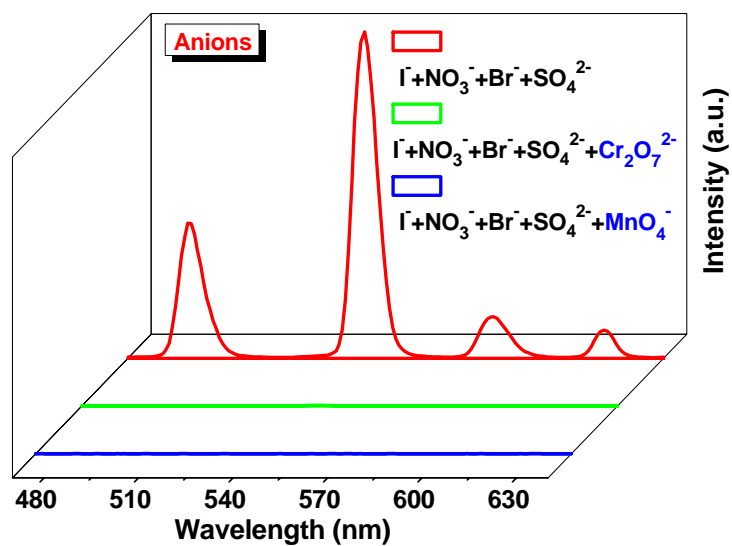

**Fig. S11** Emission spectra of 534-MOF-Tb soaking in mixed anions aqueous solutions without or with  $\text{Cr}_2\text{O}_7^{2-}$  or  $\text{MnO}_4^-$ .

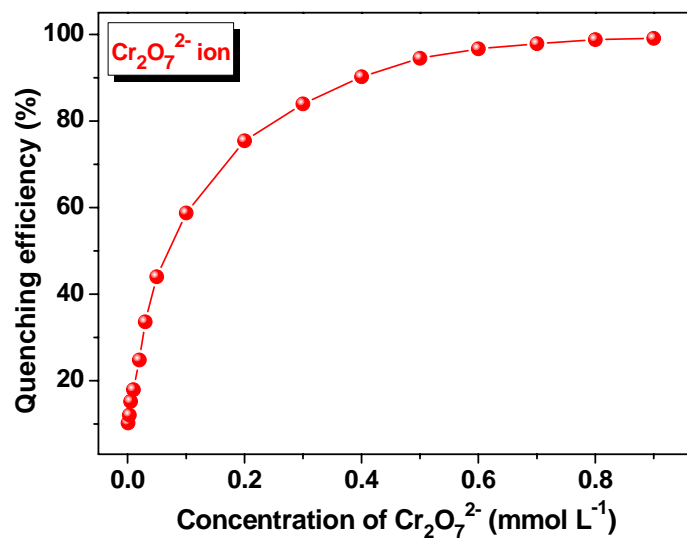

(a)

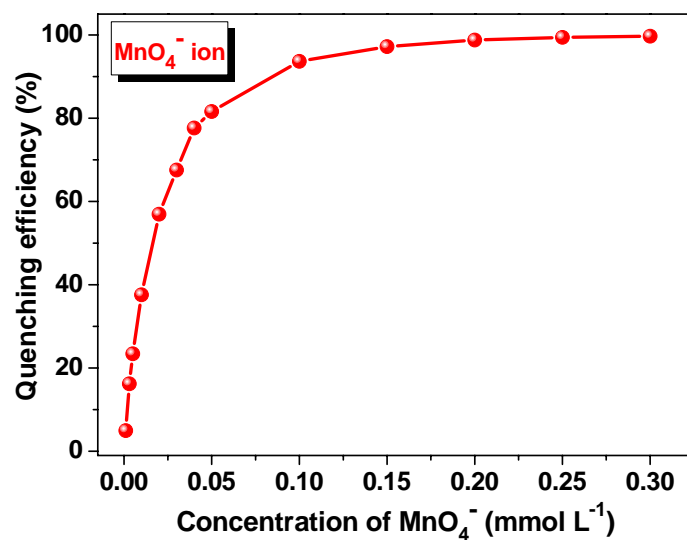

(b)

**Fig. S12** Dependence of the quenching efficiencies on the concentration of  $\text{Cr}_2\text{O}_7^{2-}$  (a) and  $\text{MnO}_4^-$  (b).

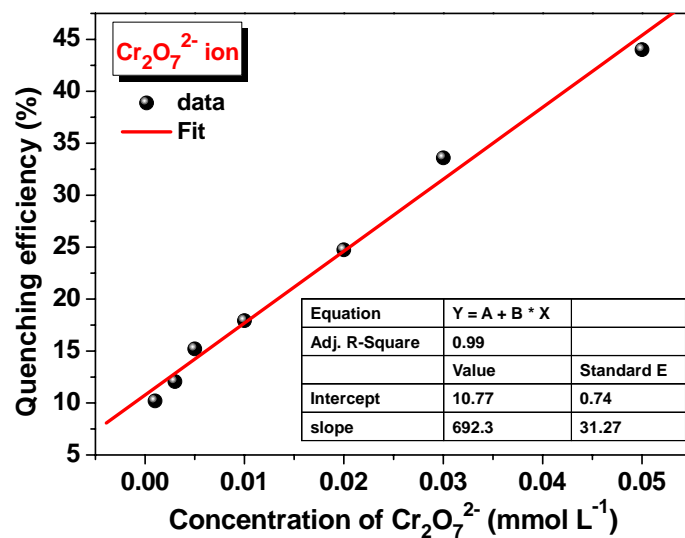

(a)

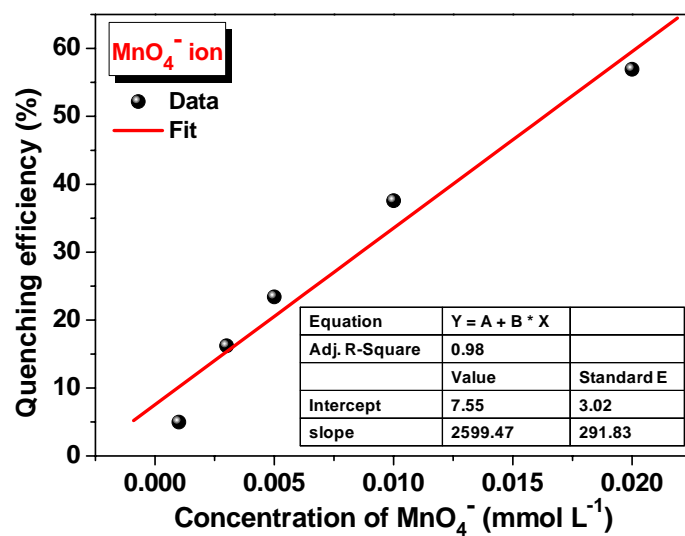

(b)

**Fig. S13** The fitting plot of the quenching efficiencies with the increasing concentration of Cr<sub>2</sub>O<sub>7</sub><sup>2-</sup> (a) and MnO<sub>4</sub><sup>-</sup> (b) in the low concentration range. The red line corresponds to a fit to the linear relationship.

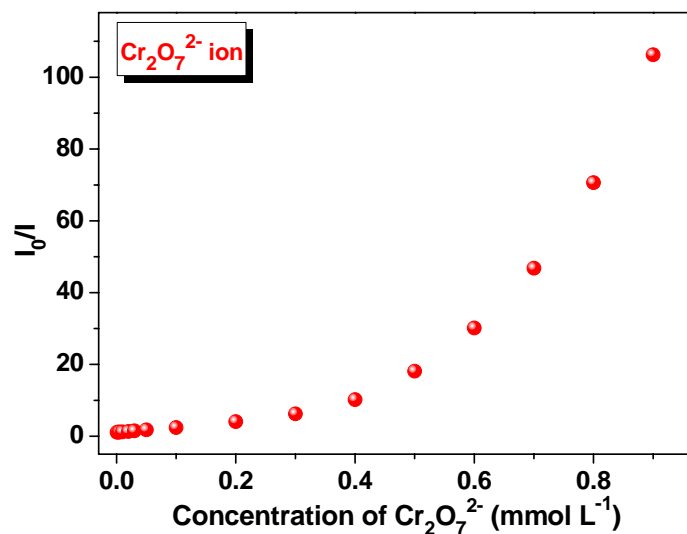

(a)

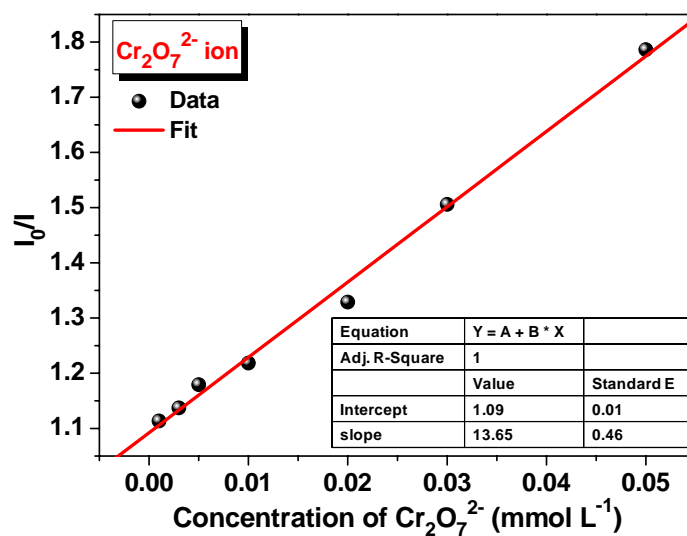

(b)

**Fig. S14** (a) Stern–Volmer plot of  $I_0/I$  versus the concentration of  $\text{Cr}_2\text{O}_7^{2-}$ . (b) The linear Stern–Volmer plot in the low concentration range. The red line corresponds to a fit to the linear relationship.



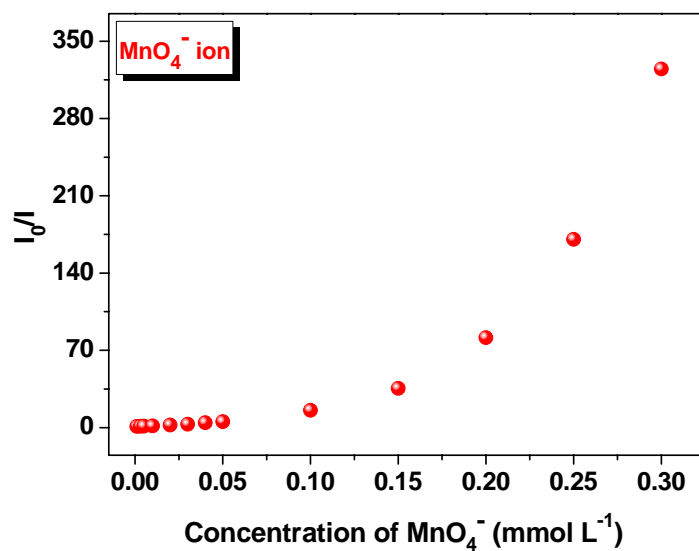

(a)

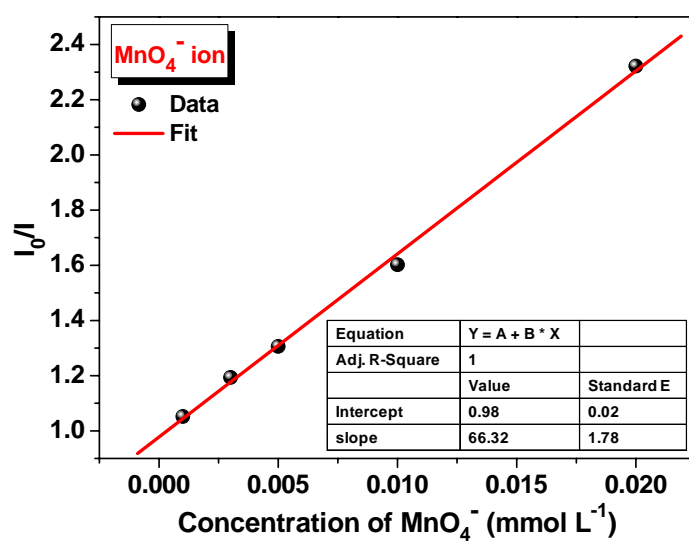

(b)

**Fig. S15** (a) Stern–Volmer plot of  $I_0/I$  versus the concentration of  $\text{MnO}_4^-$ . (b) The linear Stern–Volmer plot in the low concentration range. The red line corresponds to a fit to the linear relationship.

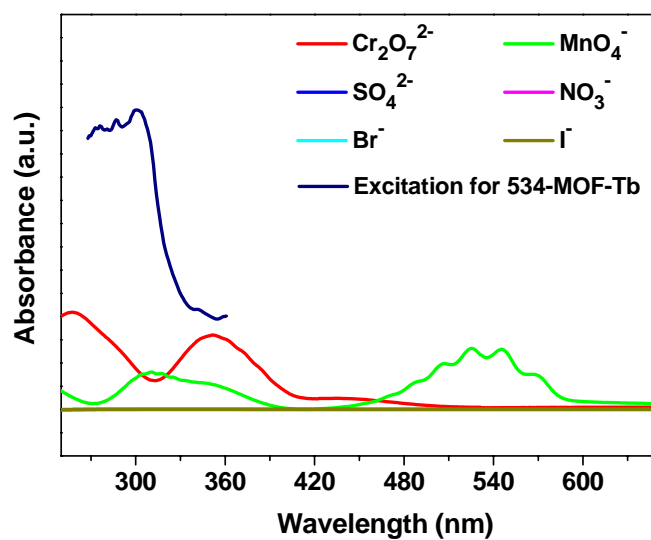

**Fig. S16** The UV–Vis absorption spectra of aqueous solutions of testing anions ( $\text{Br}^-$ ,  $\text{I}^-$ ,  $\text{NO}_3^-$ ,  $\text{SO}_4^{2-}$ ,  $\text{MnO}_4^-$ , and  $\text{Cr}_2\text{O}_7^{2-}$ ) and the excitation for 534-MOF-Tb.

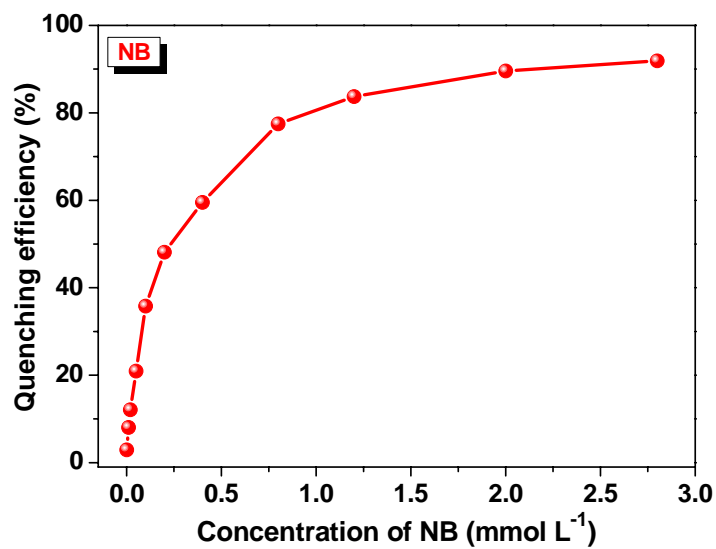

(a)

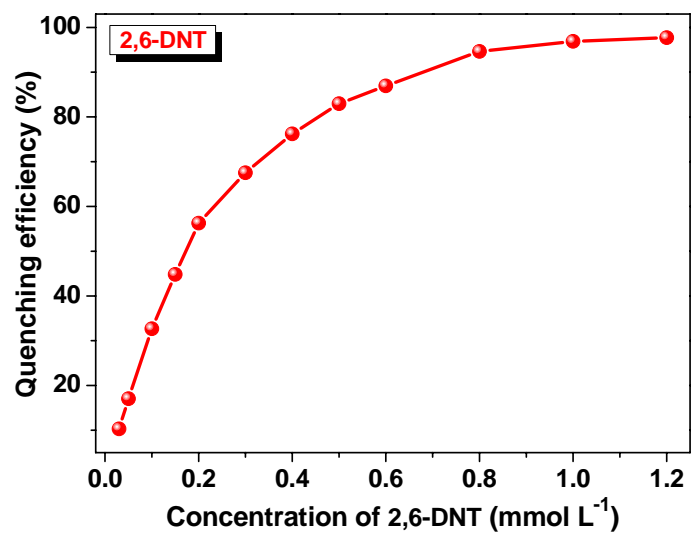

(b)

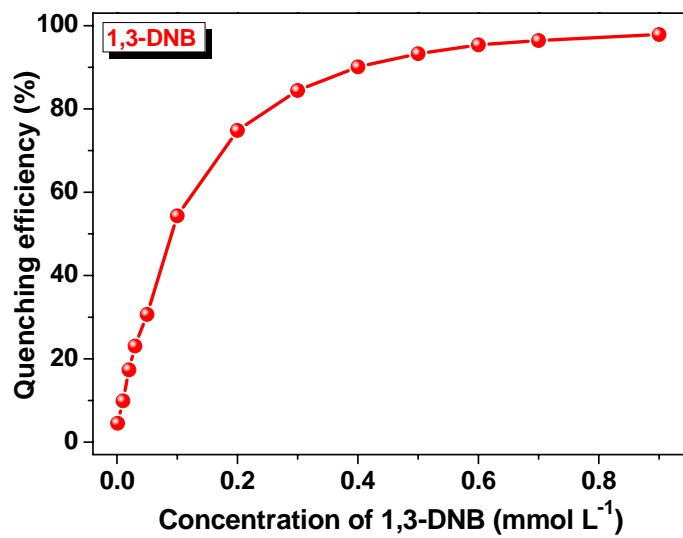

(c)

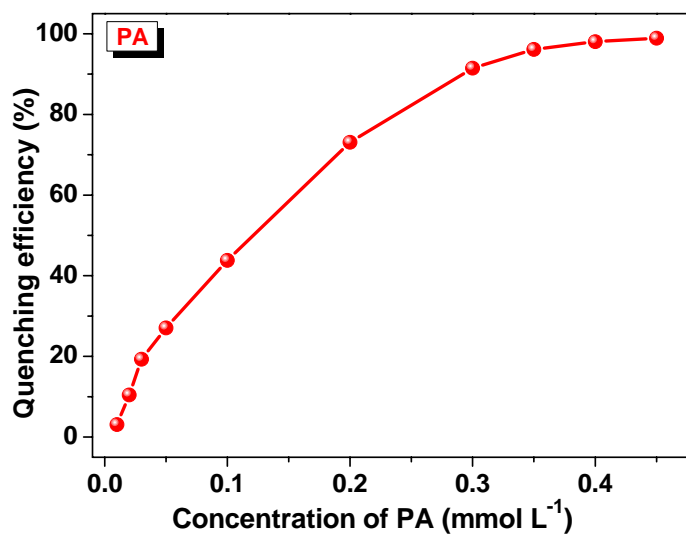

(d)

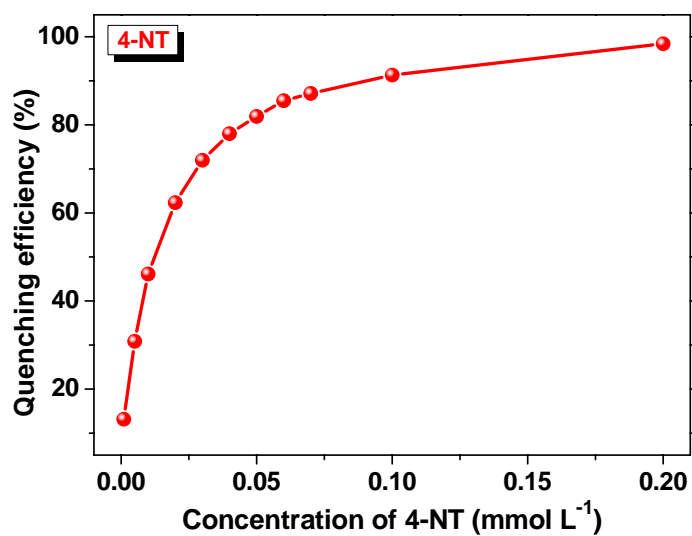

(e)

**Fig. S17** Dependence of the quenching efficiencies on the concentration of NB (a), 2,6-DNT (b), 1,3-DNB (c), PA (d), and 4-NT (e).

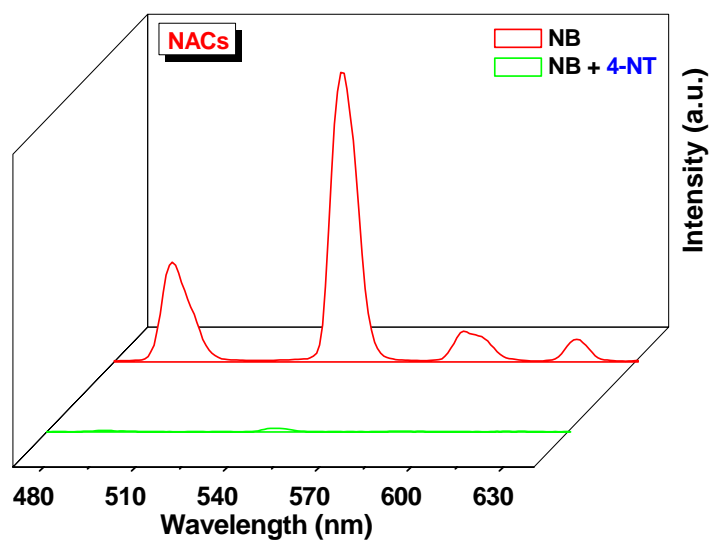

(a)

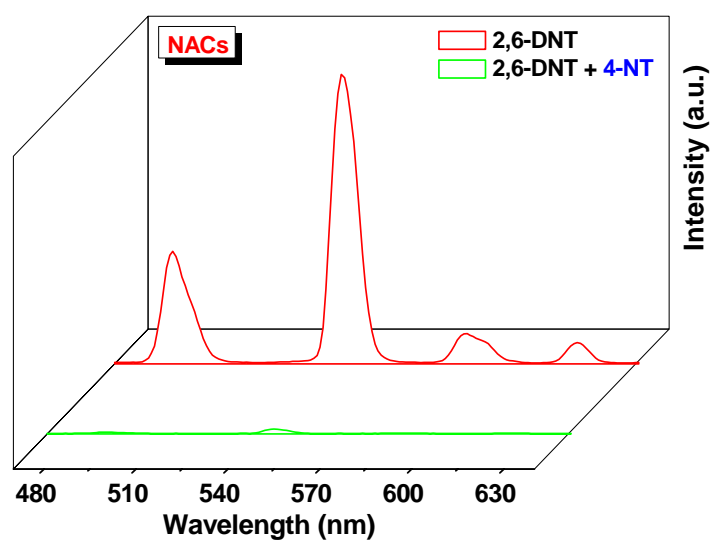

(b)

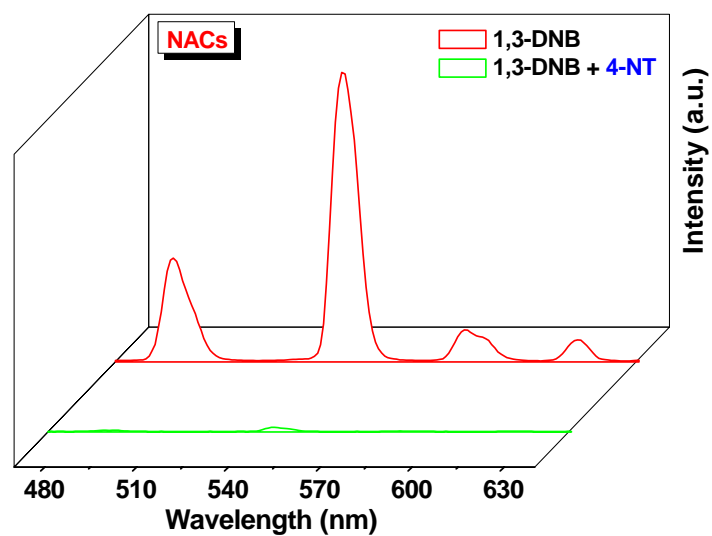

(c)

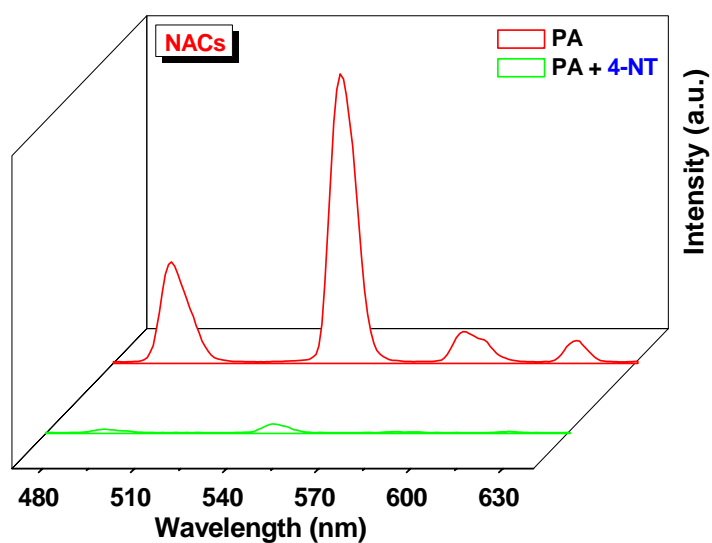

(d)

**Fig. S18** Emission spectra of 534-MOF-Tb soaking in the single and mixed NACs DMF solutions with 4-NT.

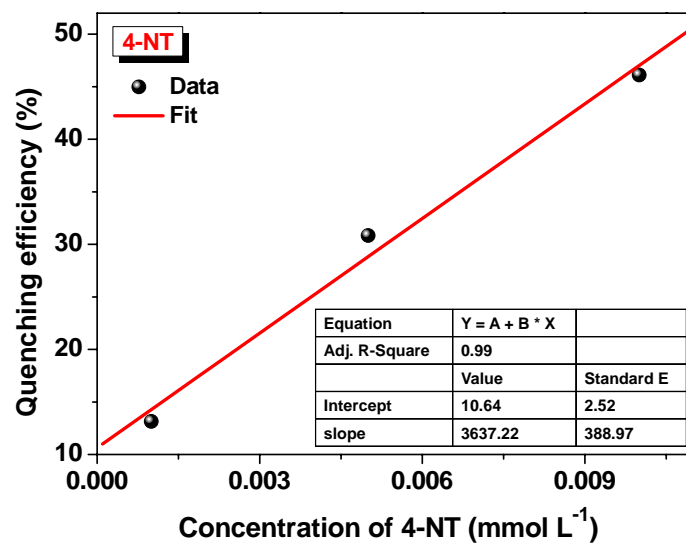

**Fig. S19** The fitting plot of the quenching efficiency with the increasing concentration of 4-NT in the low concentration range. The red line corresponds to a fit to the linear relationship.



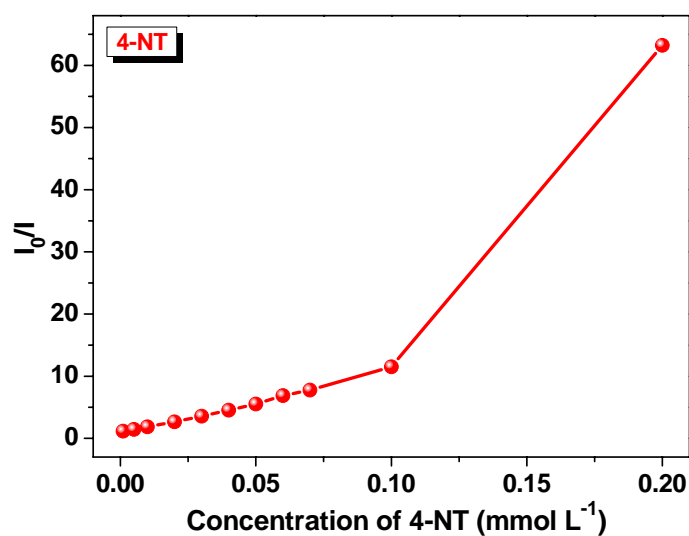

(a)

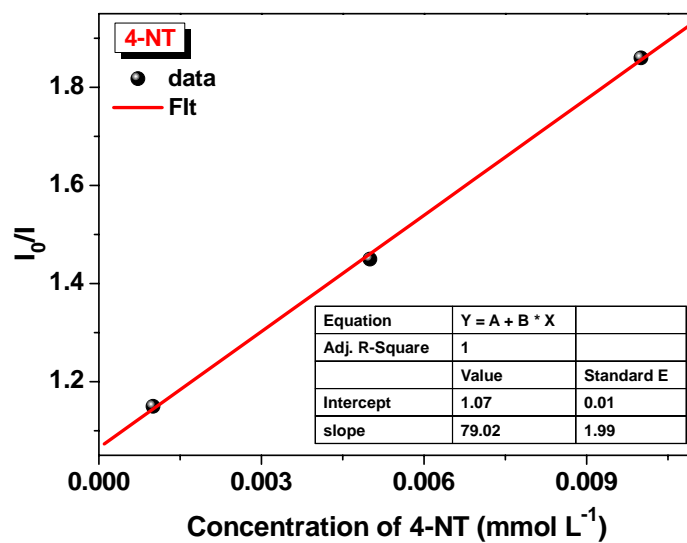

(b)

**Fig. S20** (a) Stern–Volmer plot of  $I_0/I$  versus the concentration of 4-NT. (b) The linear Stern–Volmer plot in the low concentration range. The red line corresponds to a fit to the linear relationship.

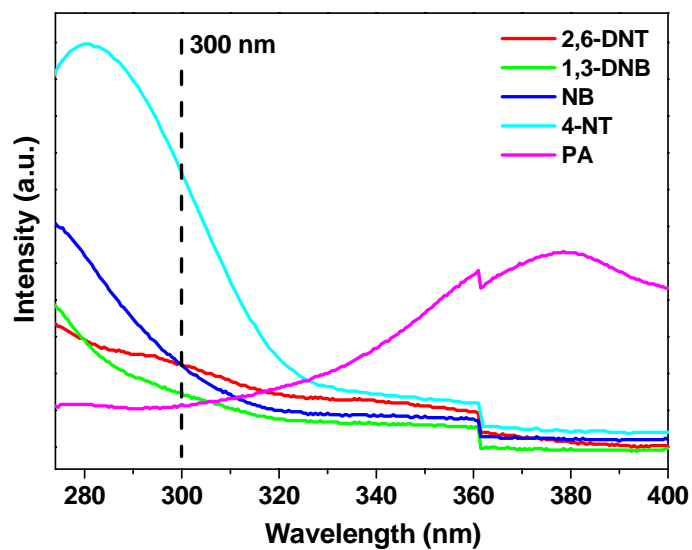

**Fig. S21** UV-Vis absorption spectra of the solutions of different NACs with the same concentration of 200 ppm.

## References

- S1** L.-H. Cao, F. Shi, W.-M. Zhang, S.-Q. Zang and T. C. W. Mak, *Chem. Eur. J.*, 2015, **21**, 15705.
- S2** S.-T. Zhang, J. Yang, H. Wu, Y.-Y. Liu and J.-F. Ma, *Chem. Eur. J.*, 2015, **21**, 15806.
- S3** S. Dang, E. Ma, Z.-M. Sun and H. Zhang, *J. Mater. Chem.*, 2012, **22**, 16920.
- S4** L. Li, Q. Chen, Z. Niu, X. Zhou, T. Yang and W. Huang, *J. Mater. Chem. C*, 2016, **4**, 1900.
- S5** G.-P. Li, G. Liu, Y.-Z. Li, L. Hou, Y.-Y. Wang and Z. Zhu, *Inorg. Chem.*, 2016, **55**, 3952.
- S6** L. Wen, X. Zheng, K. Lv, C. Wang and X. Xu, *Inorg. Chem.*, 2015, **54**, 7133.
- S7** B. Ding, S. X. Liu, Y. Cheng, C. Guo, X. X. Wu, J. H. Guo, Y. Y. Liu and Y. Li, *Inorg. Chem.*, 2016, **55**, 4391.
